# Supplementary material for: Relative abundance of derelict fishing gear in the Hawaii-based pelagic longline fishery grounds as estimated from fishery observer data
Source: PubMed Central journal article supplement (PMC7210986; doi:10.1038/s41598-020-64771-1), 2020-05-08
Supplement: 41598_2020_64771_MOESM1_ESM.pdf [file 41598_2020_64771_MOESM1_ESM.pdf]

1 **Supplementary Information for**

2 Relative abundance of derelict fishing gear in the Hawaii-based pelagic longline fishery  
3 grounds as estimated from fishery observer data  
4

5 Amy V. Uhrin<sup>1\*</sup>, William A. Walsh<sup>2</sup>, Jon Brodziak<sup>3</sup>

6 <sup>1</sup>Department of Commerce, National Oceanic and Atmospheric Administration, National  
7 Ocean Service, Office of Response and Restoration, Marine Debris Division, Silver  
8 Spring, MD 20910 USA.

9 <sup>2</sup>Walsh Analytical Service, Kailua, HI 96734 USA.

10 <sup>3</sup>Department of Commerce, National Oceanic and Atmospheric Administration, National  
11 Marine Fisheries Service, Pacific Islands Fisheries Science Center, 1845 Wasp  
12 Boulevard, Honolulu, HI 96818 USA.

13

14 \*Corresponding author: Amy V. Uhrin

15 E-mail: amy.uhrin@noaa.gov

16 Tel.: 240-533-0426

17 Fax: 301-713-4389

18

19 **This PDF file includes:**

20       Supplementary text

21       Supplementary Tables S1 to S3

22       Supplementary References

23

24 **SI Text**

25 **Methods**

26 *Fishery description*

27       Catches from the Hawai'i-based pelagic longline fishery account for 90% of  
28 commercial pelagic landings in Hawai'i with over 33 million pounds landed in 2016  
29 having an ex-vessel value exceeding \$100 million [1]. Vessels in the deep-set sector  
30 target bigeye tuna (*Thunnus obesus*) at roughly 250 m deploying 20-32 hooks per float

31 (mean: 26.8) whereas vessels in the shallow-set sector target swordfish (*Xiphias gladius*)  
32 at around 60 m deploying two to six hooks between floats (mean: 4.3) [2]. Shallow-set  
33 vessels typically deploy longline gear around sunset using over 1000 hooks per set on  
34 average (range: 915.6 - 1102.8) and their activity is concentrated at relatively high  
35 latitudes (ca. 27-37°N) during the first and fourth quarters of the calendar year. Deep-set  
36 sector vessels deploy gear after dawn using upwards of 2300 hooks on average per  
37 longline set (range: 2255.5 - 2544.7) and operate southward toward the equator with  
38 continuous and widespread fishing effort throughout the year. Soak times for both sectors  
39 are on the order of 20 hours with slight variation [2].

#### 40 *Longline gear configuration*

41 The submerged mainline does not extend as a straight line but rather assumes the  
42 shape of a catenary due to the weight of the branch lines. Thus, the depth of the deepest  
43 settled hook and the angle of the catenary depend on the number of hooks between floats.  
44 Shoaling of the mainline also occurs in response to environmental factors such as wind  
45 stress, surface current velocity, and current shear [2]. Without the aid of depth recording  
46 devices attached to the gear and subsequent use of catenary geometry, it is difficult to  
47 accurately estimate the total length of a deployed longline and the fishing depth. Bigelow  
48 et al. [2] experimentally deployed temperature-depth recorders to derive mean mainline  
49 lengths of 74.5 km (range: 18.5-111.1) and 64.4 km (range: 27.8-111.1) for the shallow  
50 and deep sectors, respectively. In the same study, median depth of the settled deepest  
51 hook was estimated to be 59.8 m and 248 m for the shallow and deep sectors,  
52 respectively [2].

53 Regulations enacted in 2004 to reduce sea turtle interactions with longline gear in  
54 the shallow sector where such interactions are more common, require the use of circle  
55 hooks with minimum size of 18/0 and no more than a 10° offset with whole fish bait.  
56 Since 2005, fishermen in the deep sector have progressively been voluntarily switching to  
57 circle hooks of size 14/0, 15/0, or 16/0 which represents the greatest proportion of hook  
58 types used (30-40%) [2]. A very small proportion of fishermen continue to use Japanese-  
59 style tuna hooks or 18/0 circle hooks and some fishermen use a combination of the above  
60 types [2].

61 *Pacific Islands Region Observer Program data*

62 In 1994, NOAA's Pacific Islands Region Observer Program (PIROP) initiated  
63 onboard observations of species-specific catch and other operational details from vessels  
64 participating in the Hawai'i-based pelagic longline fishery as a means of measuring  
65 interaction rates between longline gear and protected and endangered species. Observers  
66 record species-specific catch tallies from each longline set together with a suite of  
67 operational parameters utilizing protocols established by the NOAA Fisheries Pacific  
68 Islands Regional Office [4].

69 PIROP has maintained 17-22% annual observer coverage of deep-set sector trips  
70 since 2001 and 100% observer coverage of the shallow-set sector since 2005. The main  
71 priority of PIROP observers is the collection of information pertaining to incidental  
72 interactions of protected species with commercial longline fishing activities (i.e., longline  
73 set and haul). The Hawai'i Longline Observer Program Field Manual [3] describes the  
74 full complement of protocols and required forms/logs. At the conclusion of a trip,  
75 observers report to the PIROP for debriefing and enter data into the electronic Longline

76 Observer Database maintained by NOAA’s Pacific Islands Regional Office. The catch  
77 and operational data collected by PIROP are used for several assessment purposes [4],  
78 including standardization of catch rates for target species (tuna, swordfish), bycatch (i.e.,  
79 sharks, seabirds, sea turtles) and incidental catch [5-9].

#### 80 *Marine Debris Program data*

81 In 2007, PIROP observers began using the Marine Debris Encounter Report [3] to  
82 record items of marine debris observed during longline hauls. Upon observing debris,  
83 observers recorded the trip number, date, time, and the GPS coordinates. Items were  
84 assigned a debris type using the following numeric codes: 1) net, 2) rope/line, 3)  
85 monofilament, 4) metal, 5) cloth, 6) plastic sheeting/tarp, 7) floats/buoys, 8) fish  
86 aggregating device, 9) other, 10) lumber, and 11) natural debris (i.e., logs). Optional  
87 descriptive information was also recorded as well as whether the debris was brought on  
88 board. At the conclusion of a trip, the Marine Debris Encounter Reports were provided to  
89 the MDP whose staff entered the data into an electronic database maintained by the  
90 MDP.

#### 91 *CPUE standardizations*

92 Standardized CPUE for various bycatch and incidental species catches in the  
93 Hawai’i-based pelagic longline fishery are best described using a zero-inflated negative  
94 binomial model (ZINB), a result of excess zero catches as well as overdispersion  
95 (aggregated distribution) in both positive and zero catches [6, 9, 10]. We anticipated that  
96 accidental interception (“catch”) of marine debris would also have zero inflation and  
97 overdispersion for a number of reasons. It is possible lack of physical overlap between  
98 the actively fished longline and floating/submerged marine debris results in

99 “noncatchability” of some debris present in the water column and at the surface but not  
100 distributed in the depth range or surface area exploited by this fishery, leading to extra  
101 zero observations. Secondly, the primary duty of fishery observers is to sample for target  
102 and protected species. Consequently, observers may not be perfectly recording marine  
103 debris due to competing priorities [6], resulting in extra zero observations. Derelict  
104 fishing nets capture and retain smaller debris items, forming large bundles with patchy  
105 distributions and affected by larger scale and numerous spatially and temporally variable  
106 mesoscale eddies spurring off the North Pacific Subtropical Convergence Zone [11].  
107 These eddies may accumulate or repel marine debris depending on direction of rotation  
108 [12]. Thus, a high probability of zero marine debris interactions may occur if vessels do  
109 not encounter these accumulations or eddies (but the interception rate may be very high  
110 when an encounter occurs).

**Supplementary Table S1.** Summary of marine debris data from the shallow-set sector of the Hawai'i-based pelagic longline fishery as reported by PIROP fishery observers during 2008-2016. Observer prior trips (experience), hooks per set, and hooks per float are presented as means  $\pm$  one standard error (SE).

| Year         | # observed vessels | # observed longline trips | # observed longline sets | # observers | # observer prior trips (SE) | # trips with marine debris | # sets with marine debris (% of total sets observed) | # hooks per set (SE) | # hooks per float (SE) |
|--------------|--------------------|---------------------------|--------------------------|-------------|-----------------------------|----------------------------|------------------------------------------------------|----------------------|------------------------|
| 2008         | 26                 | 86                        | 1475                     | 46          | 16.5<br>(4.0)               | 39                         | 90<br>(6.1%)                                         | 915.6<br>(7.5)       | 4.3<br>(0.6)           |
| 2009         | 28                 | 104                       | 1635                     | 54          | 16.0<br>(3.7)               | 37                         | 81<br>(4.9%)                                         | 964.5<br>(7.8)       | 4.8<br>(0.1)           |
| 2010         | 26                 | 93                        | 1561                     | 52          | 14.4<br>(3.9)               | 37                         | 81<br>(5.2%)                                         | 978.6<br>(8.1)       | 4.8<br>(0.1)           |
| 2011         | 17                 | 52                        | 928                      | 37          | 16.9<br>(5.6)               | 21                         | 50<br>(5.4%)                                         | 1013.5<br>(11.1)     | 4.6<br>(0.05)          |
| 2012         | 16                 | 55                        | 913                      | 38          | 18.6<br>(4.9)               | 14                         | 38<br>(4.2%)                                         | 1098.0<br>(11.6)     | 5.2<br>(0.05)          |
| 2013         | 10                 | 28                        | 455                      | 21          | 24.1<br>(8.2)               | 12                         | 26<br>(5.7%)                                         | 1094.3<br>(14.1)     | 5.21<br>(0.1)          |
| 2014         | 14                 | 41                        | 643                      | 30          | 24.2<br>(6.4)               | 20                         | 37<br>(5.7%)                                         | 1084.5<br>(16.2)     | 5.0<br>(0.04)          |
| 2015         | 16                 | 31                        | 491                      | 26          | 21.2<br>(6.9)               | 10                         | 25<br>(5.1%)                                         | 1102.8<br>(14.5)     | 5.1<br>(0.1)           |
| 2016         | 7                  | 19                        | 341                      | 14          | 19.9<br>(12.1)              | 5                          | 12<br>(3.5%)                                         | 1102.6<br>(16.6)     | 4.8<br>(0.1)           |
| <b>Total</b> | <b>160</b>         | <b>509</b>                | <b>8442</b>              | <b>318</b>  |                             | <b>195</b>                 | <b>440</b>                                           |                      |                        |

**Supplementary Table S2.** Summary of marine debris data from the deep-set sector of the Hawai'i-based pelagic longline fishery as reported by PIROP fishery observers during 2008-2016. Observer prior trips (experience), hooks per set, and hooks per float are presented as means  $\pm$  one standard error (SE).

| Year         | # observed vessels | # observed longline trips | # observed longline sets | # observers | # observer prior trips (SE) | # trips with marine debris | # sets with marine debris | # hooks per set (SE) | # hooks per float (SE) |
|--------------|--------------------|---------------------------|--------------------------|-------------|-----------------------------|----------------------------|---------------------------|----------------------|------------------------|
| 2008         | 115                | 291                       | 3869                     | 84          | 12.2<br>(2.8)               | 31                         | 47<br>(1.2%)              | 2255.5<br>(11.8)     | 26.0<br>(0.1)          |
| 2009         | 117                | 255                       | 3491                     | 81          | 13.0<br>(3.1)               | 35                         | 59<br>(1.7%)              | 2250.6<br>(12.3)     | 25.7<br>(0.1)          |
| 2010         | 108                | 245                       | 3348                     | 92          | 10.9<br>(3.0)               | 37                         | 65<br>(1.9%)              | 2276.4<br>(12.7)     | 25.5<br>(0.1)          |
| 2011         | 116                | 260                       | 3509                     | 81          | 11.3<br>(3.1)               | 45                         | 81<br>(2.3%)              | 2346.9<br>(13.0)     | 24.9<br>(0.1)          |
| 2012         | 121                | 273                       | 3651                     | 77          | 14.7<br>(3.4)               | 13                         | 15<br>(0.4%)              | 2409.8<br>(13.3)     | 25.1<br>(0.1)          |
| 2013         | 122                | 282                       | 3772                     | 73          | 16.9<br>(3.5)               | 43                         | 67<br>(1.8%)              | 2440.3<br>(13.1)     | 25.1<br>(0.1)          |
| 2014         | 125                | 279                       | 3782                     | 74          | 18.7<br>(3.9)               | 35                         | 43<br>(1.1%)              | 2523.1<br>(13.3)     | 25.0<br>(0.1)          |
| 2015         | 123                | 277                       | 3537                     | 82          | 17.5<br>(4.1)               | 17                         | 21<br>(0.6%)              | 2520.9<br>(14.6)     | 25.0<br>(0.1)          |
| 2016         | 116                | 240                       | 3171                     | 59          | 22.8<br>(5.4)               | 15                         | 20<br>(0.6%)              | 2544.7<br>(13.3)     | 24.7<br>(0.1)          |
| <b>Total</b> | <b>1063</b>        | <b>2402</b>               | <b>32,130</b>            | <b>703</b>  |                             | <b>271</b>                 | <b>418</b>                |                      |                        |

**Supplementary Table S3.** Summary of stepwise variable selection results for a zero-inflated negative binomial model of marine debris counts (minimum number of marine debris items per set), namely derelict fishing gear, reported from the Hawai'i-based pelagic longline fishery during 2008-2016. The summary includes degrees of freedom (df) associated with each variable, Akaike Information Criterion (AIC), the reduction in AIC ( $\Delta$ AIC), the reduction in AIC per degree of freedom ( $\Delta$ AIC/df), the median residual from the fitted model, and the maximum likelihood estimate of the overdispersion parameter ( $k$ ).

| Parameter                                | df | AIC      | $\Delta$ AIC | $\Delta$ AIC/df | Median residual | k      |
|------------------------------------------|----|----------|--------------|-----------------|-----------------|--------|
| <i>Negative binomial count model</i>     |    |          |              |                 |                 |        |
| Intercept                                | 1  | 10439.22 | .            | .               | -0.1162         | 0.1912 |
| Year                                     | 8  | 10328.39 | 110.82       | 13.85           | -0.1140         | 0.0215 |
| Quarter                                  | 3  | 10218.97 | 109.42       | 36.47           | -0.1183         | 0.1527 |
| Sector                                   | 1  | 9628.69  | 590.28       | 590.28          | -0.1174         | 0.0414 |
| Latitude                                 | 1  | 9293.10  | 335.60       | 335.60          | -0.1145         | 0.0529 |
| <i>Logistic model for zero inflation</i> |    |          |              |                 |                 |        |
| Longitude                                | 1  | 9206.19  | 86.91        | 86.91           | -0.1118         | 0.1498 |
| Convergence zone                         | 1  | 9184.95  | 21.24        | 21.24           | -0.1130         | 0.1824 |
| Observer                                 | 1  | 8819.69  | 365.26       | 365.26          | -0.0966         | 0.5098 |
| Sector                                   | 1  | 8786.13  | 33.56        | 33.56           | -0.0925         | 0.8377 |

### Supplementary References

1. Western Pacific Regional Fishery Management Council. Annual stock assessment and fishery evaluation report for U.S. Pacific Island pelagic fisheries 2018, <http://www.wpcouncil.org/wp-content/uploads/2019/07/Pelagic-FEP-SAFE-Report-2018-Optimized-v4.pdf> (2018)
2. Bigelow, K., Musyl, M. K., Poisson, F., & Kleiber, P. Pelagic longline gear depth and shoaling. *Fish. Res.* **77**, 173-183 (2006). United States Department of Commerce. Fisheries off West Coast states and in the western Pacific; highly migratory species fisheries.
3. Pacific Islands Region Observer Program. Hawai'i longline observer program field manual version LM.17.02, <https://www.fisheries.noaa.gov/pacific-islands/fisheries-observers/pacific-islands-region-observer-resources> (2017)
4. Walsh, W. A., & Brodziak, J. Applications of Hawai'i Longline Fishery Observer and Logbook Data for Stock Assessment and Fishery Research, NOAA Technical Memorandum NOAA-TM-NMFS-PIFSC-57, <https://repository.library.noaa.gov/view/noaa/14384> (2016)
5. McCracken, M. L. Modeling a very rare event to estimate sea turtle bycatch: lessons learned. NOAA Technical Memorandum, NOAA-TM-NMFSPIFSC-3, [https://pifsc-www.irc.noaa.gov/library/pubs/tech/NOAA\\_Tech\\_Memo\\_PIFSC\\_3.pdf](https://pifsc-www.irc.noaa.gov/library/pubs/tech/NOAA_Tech_Memo_PIFSC_3.pdf) (2004)

6. Brodziak, J. & Walsh, W. A. Standardizing catch rates of bycatch species using multimodel inference: A case study of oceanic whitetip shark in the Hawai'i longline fishery. *Can. J. Fish. Aquat. Sci.* **70**, 1723–1740 (2013)
7. Gilman, E., Chaloupka, M., Peschon, J., & Ellgen, S. Risk factors for seabird bycatch in a pelagic longline tuna fishery. *PLoS ONE* **11(5)**, e0155477 (2016)
8. Swimmer, Y., Gutierrez, A., Bigelow, K., Barceló, C., Schroeder, B., Keene, K., Shattenkirk, K. & Foster, D. G. Sea turtle bycatch mitigation in U.S. longline fisheries. *Front. Mar. Sci.* **4**, 260 (2017)
9. Walsh, W. A. & Brodziak, J. Billfish CPUE standardization in the Hawai'i longline fishery: model selection and multimodel inference. *Fish. Res.* **166**, 151-162 (2015)
10. Zuur, A., Ieno, E. N., Walker, N. J., Saveliev, A. A. & Smith, G. M. Zero-truncated and zero-inflated models for count data in *Mixed Effects Models and Extensions in Ecology with R*. (eds. Gail, M., Krickeberg, K., Samet, J. M., Tsiatis, A. & Wong, W.) 261-294 (Springer Science + Business Media, LLC, 2009).
11. Roden, G. I. Subarctic-subtropical transition zone of the North Pacific: largescale aspects and mesoscale structure in *Biology, Oceanography and Fisheries of the North Pacific Transition Zone and the Subarctic Frontal Zone*, NOAA Technical Report NMFS 105. (ed. Wetherall, J. A.) 1-38 (US Department of Commerce, 1991).
12. Howell, E. A., Bograd, S. J., Morishige, C., Seki, M. P. & Polovina, J. J. On North Pacific circulation and associated marine debris concentration. *Mar. Poll. Bull.* **65**, 16-22 (2012).
